# Supplementary material
Source: PubMed Central journal article supplement (PMC9168526)

**Supplementary Table 1.** Exclusion criteria in the selected trials

| <b>Reference</b>     | <b>Exclusion Criteria</b>                                                                                                                                                                                                                                                                                                                                                                                                                                                                                                                                                      |
|----------------------|--------------------------------------------------------------------------------------------------------------------------------------------------------------------------------------------------------------------------------------------------------------------------------------------------------------------------------------------------------------------------------------------------------------------------------------------------------------------------------------------------------------------------------------------------------------------------------|
| ACTT-2               | Alanine aminotransferase (ALT) or an aspartate aminotransferase (AST) > 5 times the upper limit of the normal range; impaired renal function as determined by calculating an estimated glomerular filtration rate (eGFR) or need for hemodialysis or hemofiltration; allergy to study product; pregnancy or breast-feeding; and anticipated discharge from the hospital or transfer to another hospital within 72 hours of enrollment.                                                                                                                                         |
| COV-BARRIER          | At study entry, if patients required invasive mechanical ventilation (National Institute of Allergy and Infectious Disease Ordinal Scale [NIAID-OS] score 7); were receiving immunosuppressants (high-dose corticosteroids, biologics, T-cell-targeted or B-cell-targeted therapies, interferon, or JAK inhibitors); had ever received convalescent plasma or intravenous immunoglobulin for COVID-19; or had neutropenia (absolute neutrophil count                                                                                                                           |
| COV-BARRIER (Severe) | Patients on high dose corticosteroids (>20 mg per day [or prednisone equivalent] administered for >14 consecutive days in the month before study, unless indicated per SOC for a concurrent condition, such as asthma, chronic obstructive pulmonary disease, or adrenal insufficiency), immunosuppressants, biologics, T cell or B cell targeted therapies, interferon, or JAK inhibitors; receipt of convalescent plasma or intravenous immunoglobulin for COVID-19; or suspected serious active bacterial, fungal, or other infection, or untreated tuberculosis infection. |
| RECOVERY             | Age < 2 years, eGFR < 15 ml/min/1.73 m <sup>2</sup> , or on dialysis or hemofiltration, neutrophil count < 0.5 x 10 <sup>9</sup> /L, had evidence of TB infection, or were pregnant or breast feeding.                                                                                                                                                                                                                                                                                                                                                                         |

**Supplementary Table 2.** Pooled Odds Risk of Clinical Outcomes Using Fixed-Effects Model

| <b>Trial</b>                                                                             | <b>Baricitinib versus placebo/usual care OR (95% CI)</b> |
|------------------------------------------------------------------------------------------|----------------------------------------------------------|
| <b>28-day mortality</b>                                                                  | 0.82, 95% CI 0.73-0.92; I <sup>2</sup> = 65%             |
| <b>Progression to respiratory failure needing positive pressure ventilation or death</b> | 0.89, 95% CI 0.80-0.99; I <sup>2</sup> = 0%              |
| <b>Progression to invasive mechanical ventilation or ECMO</b>                            | 0.80, 95% CI 0.69-0.94; I <sup>2</sup> = 49%             |

Supplementary Figure 1. Cochrane Risk of Bias

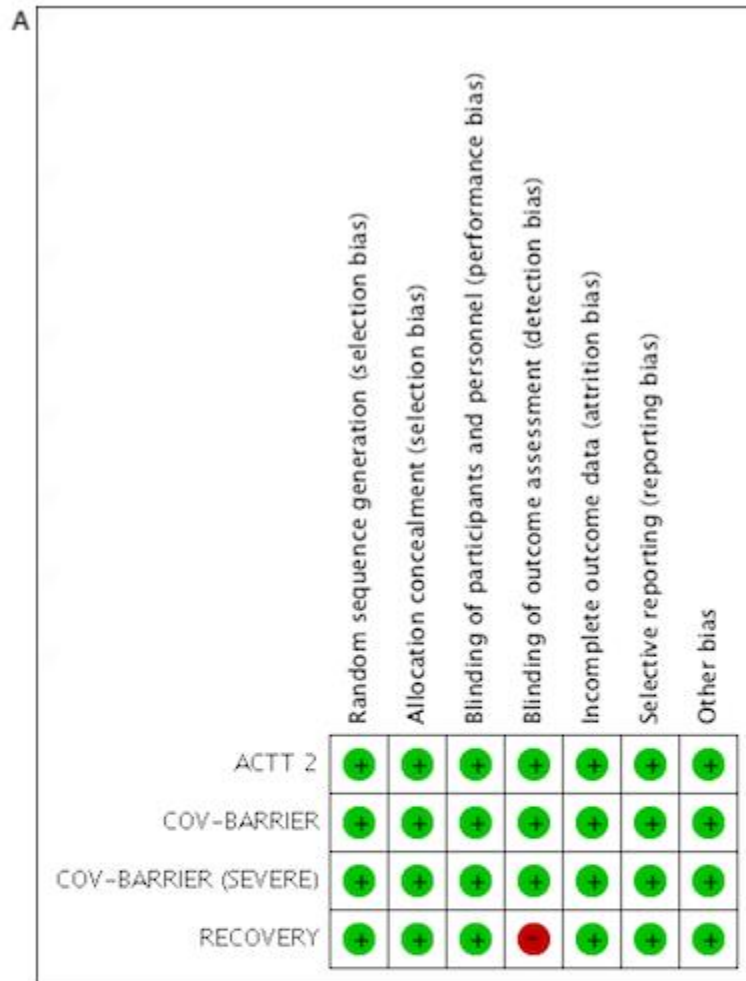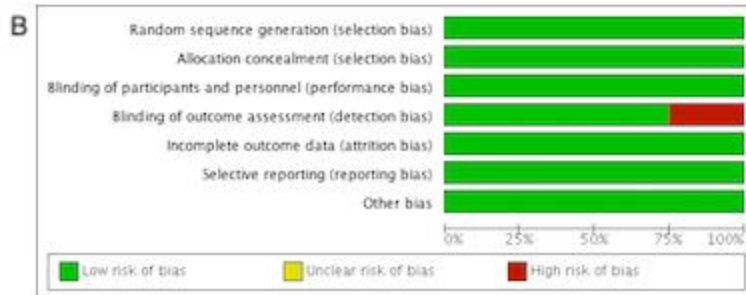

**Supplementary Figure 2.** Subgroup analysis of 28-day mortality in non-critically ill patients

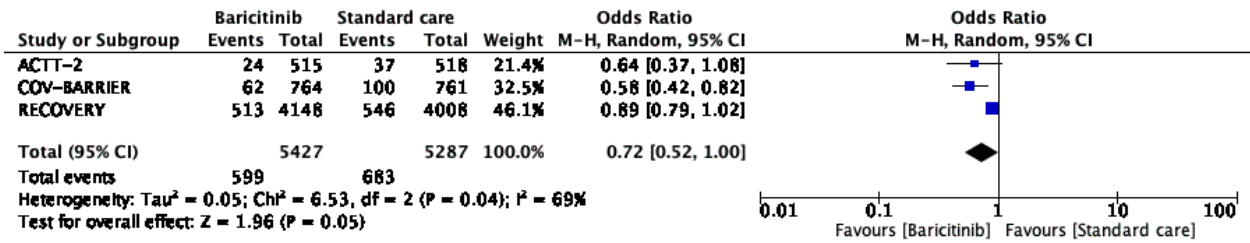

Supplement: mmc1.pdf [file mmc1.pdf]
